# Supplementary material for: Neltuma nigracotyledon and seed flour: nutritional, phytochemical, and techno-functional characterization and nutraceutic potential of polyphenolic enriched extract
Source: Royal Society of Chemistry journal article supplement (doi:10.1039/d4fo01827c), 2024-01-01
Supplement: d4fo01827c1.pdf [file d4fo01827c1.pdf]

### -Yield phenolics extracts

| Sample | Weight (1 ml dried extract+eppendorf) | Weight Eppendorf | Weight sample | Starting sample weight | Yield %     |
|--------|---------------------------------------|------------------|---------------|------------------------|-------------|
| spn    | 0.7891                                | 0.7444           | 0.0447        | 1.0265                 | 4.35460302  |
| spn    | 0.8048                                | 0.7636           | 0.0412        | 1.0265                 | 4.013638578 |
| spn    | 0.796                                 | 0.7519           | 0.0441        | 1.0265                 | 4.296151973 |
| cpn    | 0.7964                                | 0.7639           | 0.0325        | 1.038                  | 3.131021195 |
| cpn    | 0.7821                                | 0.7498           | 0.0323        | 1.038                  | 3.111753372 |
| cpn    | 0.7747                                | 0.7444           | 0.0303        | 1.038                  | 2.919075145 |

### -Mineral analysis

| Parameter Tested | Method Used          | Unit of Measurement |
|------------------|----------------------|---------------------|
| metals           | ICP-MS determination | <b>µg/g</b>         |

### Additional information

LDM= Limit of detection of the method,

LCM= Limit of quantification of the method

SD= Standard deviation

| (µg/g) | Na     | Mg    | K      | Ca     | Fe     | Cu    | Zn    |
|--------|--------|-------|--------|--------|--------|-------|-------|
| LDM    | 8.234  | 0.722 | 41.462 | 89.452 | 4.110  | 0.135 | 0.327 |
| LCM    | 15.057 | 2.188 | 60.973 | 94.159 | 17.118 | 0.409 | 0.643 |

| Sample     | Na  | SD | Mg   | SD  | K     | SD  | Ca   | SD  | Fe | SD | Cu  | SD  | Zn   | SD  |
|------------|-----|----|------|-----|-------|-----|------|-----|----|----|-----|-----|------|-----|
| Cotyledons | 70  | 10 | 4000 | 100 | 12000 | 300 | 1700 | 100 | 80 | 10 | BLD | -   | BLD  | -   |
| Seeds      | 374 | 14 | 1340 | 42  | 11268 | 352 | 2244 | 81  | 78 | 2  | 8.3 | 0.2 | 29.2 | 0.4 |

### -Fiber analysis

| Sample     | Crucible weight | Filter weight | Sample weight | Total weight 100°C-Stove | Total weight-muffle | Fiber weight | Ash weight | Crude fiber | % Crude fiber |
|------------|-----------------|---------------|---------------|--------------------------|---------------------|--------------|------------|-------------|---------------|
| Cotyledons | 20.0365         | 0.371         | 1.0423        | 20.4999                  | 20.0399             | 0.0924       | 0.0034     | 0.089       | 8.538808404   |
| Cotyledons | 18.7434         | 0.3752        | 1.0111        | 19.1832                  | 18.7459             | 0.0646       | 0.0025     | 0.0621      | 6.141825734   |
| Cotyledons | 20.4637         | 0.3735        | 1.0631        | 20.9179                  | 20.4665             | 0.0807       | 0.0028     | 0.0779      | 7.327626752   |
|            |                 |               |               |                          |                     |              |            |             |               |
| seeds      | 21.9534         | 0.3605        | 2.0975        | 22.827                   | 21.9629             | 0.5131       | 0.0095     | 0.5036      | 24.00953516   |
| seeds      | 19.6376         | 0.3709        | 2.0199        | 20.4306                  | 19.6393             | 0.4221       | 0.0017     | 0.4204      | 20.81291153   |
| seeds      | 20.7104         | 0.3684        | 2.0801        | 21.5593                  | 20.7016             | 0.4805       | -0.0088    | 0.4893      | 23.52290755   |

### -Lipids quantification

| Sample     | Weight Erlenmeyer flask+Sample | Weight Erlenmeyer flask | Weight sample | Lipids | %          |
|------------|--------------------------------|-------------------------|---------------|--------|------------|
| Cotyledons | 80.9081                        | 80.7848                 | 1.0039        | 0.1233 | 12.2820998 |
| Cotyledons | 124                            | 124.3772                | 1.038         | 0.1081 | 10.4142582 |
| Cotyledons | 134.5492                       | 133.9774                | 5.0219        | 0.5718 | 11.3861288 |
| Seeds      | 100.8722                       | 100.8375                | 1.0023        | 0.0347 | 3.46203731 |
| Seeds      | 86.6097                        | 86.5872                 | 1.0265        | 0.0225 | 2.19191427 |

|       |         |          |         |        |            |
|-------|---------|----------|---------|--------|------------|
| Seeds | 124.773 | 124.3717 | 10.0186 | 0.4013 | 4.00554968 |
|-------|---------|----------|---------|--------|------------|

### -Carbohydrate quantification

Calibration curve:  $Y=0.0182X$ -  $R^2= 0.9947$

| Sample                                 | DO    | DO'   | DO''  | vol (ml) | g de har |
|----------------------------------------|-------|-------|-------|----------|----------|
| Cotyledons sugar extraction 10 $\mu$ L | 0.782 | 0.782 | 0.809 | 1        | 0.5      |
| Seeds sugar extraction-10 $\mu$ L 1/5  | 0.67  | 0.709 | 0.689 | 2        | 0.5      |

### -Free phenolic compounds quantification

Calibration Curve:  $Y=0.0699x$ -  $R^2=0.9999$

| Sample                   | DO 1  | DO2   | DO    | Volumen | Sample weight |
|--------------------------|-------|-------|-------|---------|---------------|
| Cotyledons extract-10 ul | 0.217 | 0.236 | 0.257 | 40      | 6.8068        |
| Seeds extract-10 ul      | 0.628 | 0.68  | 0.669 | 50      | 7.008         |

### -Bound phenolic compounds quantification

Calibration Curve:  $Y=0.0699x$  - $R^2=0.9999$

| Muestra                       | DO    | DO    | DO    | DO prom    |
|-------------------------------|-------|-------|-------|------------|
| Cotyledons extract-50 $\mu$ L | 0.121 | 0.121 | 0.116 | 0.11933333 |
| Seeds extract-20 $\mu$ L      | 0.171 | 0.195 | 0.205 | 0.19033333 |

### -Flavonoids phenolic compounds quantification

Calibration curve:  $Y=0,017.X$   $R^2=0.9996$

| Sample                         | DO    | DO    | DO    | Volumen (mL) | Sample Weight (g) |
|--------------------------------|-------|-------|-------|--------------|-------------------|
| Seeds extract- 30 $\mu$ L      | 0.095 | 0.092 | 0.097 | 50           | 7.008             |
| Cotyledons extract- 30 $\mu$ L | 0.116 | 0.112 | 0.112 | 40           | 6.8068            |

### -Condensed tannins compounds quantification

Calibration curve:  $Y=0.0708X$  -  $R^2=0.9931$

| Sample     | DO    | DO    | DO    | Volumen extract (mL) | Weight of phenolic compounds extraction residue (g) |
|------------|-------|-------|-------|----------------------|-----------------------------------------------------|
| Seeds      | 0.621 | 0.619 | 0.609 | 13                   | 2.0023                                              |
| Cotyledons | BDL   | BDL   | BDL   | -                    | -                                                   |

### -Phenolic compound profile and HPLC quantification

Compounds **1**, **2**, **5** and **6** were quantified with a reference curve of schaftoside.

Compounds **7** and **8** were quantified with a reference curve of vitexin.

| Compound | Rt (min) | UV (nm)  | MS  | MS/MS                                            | Tentative identification | Seed phenolic extracts mg/g | Cotyledons phenolic extracts mg/g |
|----------|----------|----------|-----|--------------------------------------------------|--------------------------|-----------------------------|-----------------------------------|
| <b>1</b> | 16.45    | 324, 273 | 725 | 635 (61), 605 (100), 563 (83), 473 (28), 353 (6) | Isoschaftoside hexoside  | 1.09                        | BDL                               |
| <b>2</b> | 19.22    | 324, 273 | 725 | 665 (16), 635 (22), 605 (38), 563 (100)          | Schaftoside hexoside     | 1.54                        | BDL                               |
| <b>3</b> | 28.38    | 335, 271 | 593 | 575 (6), 503 (27), 473 (100), 353 (13)           | Vicenin II/Isomer        | 0.18                        | BDL                               |
| <b>4</b> | 37.45    | 338, 271 | 563 | 545 (22), 503 (57), 473 (100), 443 (18)          | Isoschaftoside           | 16.16                       | 3.21                              |
| <b>5</b> | 40.21    | 337, 272 | 563 | 545 (11), 473 (68), 443 (100), 353 (18)          | Schaftoside              | 10.72                       | 2.13                              |
| <b>6</b> | 47.19    | -        | 431 | 311 (100)                                        | Vitexin                  | 0.16                        | BDL                               |
| <b>7</b> | 49.86    | 334, 272 | 431 | 341 (38), 311 (100)                              | Isovitexin               | 0.93                        | BDL                               |

### -Antioxidant activity

#### -Depuration radical-cation ABTS

#### Cotyledons

| ABTS Cotyledons <i>Neltuma nigra</i> )            |           |           |                 |           |             |           |
|---------------------------------------------------|-----------|-----------|-----------------|-----------|-------------|-----------|
|                                                   | DO sample |           | DO control 100% |           | %scavenging |           |
| Sample                                            | 1 minute  | 6 minutes | 1 minute        | 6 minutes | 1 minute    | 6 minutes |
| 3.37 µg/ml                                        | 0.54      | 0.417     | 0.597           | 0.595     | 9.55        | 29.92     |
| 6.77 µg/ml                                        | 0.504     | 0.33      | 0.626           | 0.596     | 19.49       | 44.63     |
| 10.17 µg/ml                                       | 0.314     | 0.22      | 0.586           | 0.523     | 46.42       | 57.93     |
| ABTS Cotyledons <i>Neltuma nigra</i> )-Duplicate  |           |           |                 |           |             |           |
|                                                   | DO sample |           | DO control 100% |           | %scavenging |           |
| Sample                                            | 1 minute  | 6 minutes | 1 minute        | 6 minutes | 1 minute    | 6 minutes |
| 3.37 µg/ml                                        | 0.523     | 0.4       | 0.597           | 0.595     | 12.40       | 32.77     |
| 6.77 µg/ml                                        | 0.482     | 0.313     | 0.626           | 0.596     | 23.00       | 47.48     |
| 10.17 µg/ml                                       | 0.44      | 0.268     | 0.586           | 0.523     | 24.91       | 48.76     |
| ABTS Cotyledons <i>Neltuma nigra</i> )-Triplicate |           |           |                 |           |             |           |
|                                                   | DO sample |           | DO control 100% |           | %scavenging |           |

| Sample      | 1 minute | 6 minutes | 1 minute | 6 minutes | 1 minute | 6 minutes |
|-------------|----------|-----------|----------|-----------|----------|-----------|
| 3.37 µg/ml  | 0.52     | 0.392     | 0.597    | 0.595     | 12.90    | 34.12     |
| 6.77 µg/ml  | 0.534    | 0.3       | 0.626    | 0.596     | 14.70    | 49.66     |
| 10.17 µg/ml | 0.395    | 0.236     | 0.586    | 0.523     | 32.59    | 54.88     |

| ABTS Cotyledons <i>Neltuma nigra</i> |              |           |                        |           |                        |           |                      |           |
|--------------------------------------|--------------|-----------|------------------------|-----------|------------------------|-----------|----------------------|-----------|
| Sample (µg/ml)                       | % scavenging |           | % scavenging duplicate |           | %scavenging triplicate |           | % scavenging average |           |
|                                      | 1 minute     | 6 minutes | 1 minute               | 6 minutes | 1 minute               | 6 minutes | 1 minute             | 6 minutes |
| 3.37                                 | 9.55         | 29.92     | 12.40                  | 32.77     | 12.90                  | 34.12     | 11.61                | 32.27     |
| 6.77                                 | 19.49        | 44.63     | 23.00                  | 47.48     | 14.70                  | 49.66     | 19.06                | 47.26     |
| 10.17                                | 46.42        | 57.93     | 24.91                  | 48.76     | 32.59                  | 54.88     | 34.64                | 53.86     |

## Seeds

| ABTS Seeds <i>Neltuma nigra</i>             |           |           |                 |           |             |           |
|---------------------------------------------|-----------|-----------|-----------------|-----------|-------------|-----------|
| Sample                                      | DO sample |           | DO control 100% |           | %scavenging |           |
|                                             | 1 minute  | 6 minutes | 1 minute        | 6 minutes | 1 minute    | 6 minutes |
| SPN-1.26 µg/ml                              | 0.47      | 0.434     | 0.581           | 0.577     | 19.10       | 24.78     |
| SPN-1.88 µg/ml                              | 0.347     | 0.236     | 0.584           | 0.566     | 40.58       | 58.30     |
| SPN-3.14 µg/ml                              | 0.187     | 0.084     | 0.575           | 0.558     | 67.48       | 84.95     |
| ABTS Seeds <i>Neltuma nigra</i> -DUPLICATE  |           |           |                 |           |             |           |
| Sample                                      | DO sample |           | DO control 100% |           | %scavenging |           |
|                                             | 1 minute  | 6 minutes | 1 minute        | 6 minutes | 1 minute    | 6 minutes |
| SPN-1.26 µg/ml                              | 0.483     | 0.441     | 0.581           | 0.577     | 16.87       | 23.57     |
| SPN-1.88 µg/ml                              | 0.415     | 0.356     | 0.584           | 0.566     | 28.94       | 37.10     |
| SPN-3.14 µg/ml                              | 0.244     | 0.152     | 0.575           | 0.558     | 57.57       | 72.76     |
| ABTS Seeds <i>Neltuma nigra</i> -TRIPLICATE |           |           |                 |           |             |           |
| Sample                                      | DO sample |           | DO control 100% |           | %scavenging |           |
|                                             | 1 minute  | 6 minutes | 1 minute        | 6 minutes | 1 minute    | 6 minutes |
| SPN-1.26 µg/ml                              | 0.503     | 0.445     | 0.581           | 0.577     | 13.43       | 22.88     |

|                                 |              |           |                        |           |                        |           |                      |           |
|---------------------------------|--------------|-----------|------------------------|-----------|------------------------|-----------|----------------------|-----------|
| SPN-1.88 µg/ml                  | 0.353        | 0.254     | 0.584                  | 0.566     | 39.55                  | 55.12     |                      |           |
| SPN-3.14 µg/ml                  | 0.23         | 0.12      | 0.575                  | 0.558     | 60.00                  | 78.49     |                      |           |
| <i>ABTS Seeds Neltuma nigra</i> |              |           |                        |           |                        |           |                      |           |
|                                 | % scavenging |           | % scavenging duplicate |           | %scavenging triplicate |           | % scavenging average |           |
| Sample (µg/ml)                  | 1 minute     | 6 minutes | 1 minute               | 6 minutes | 1 minute               | 6 minutes | 1 minute             | 6 minutes |
| 1.26                            | 19.10        | 24.78     | 16.87                  | 23.57     | 13.43                  | 22.88     | 16.47                | 23.74     |
| 1.88                            | 40.58        | 58.30     | 28.94                  | 37.10     | 39.55                  | 55.12     | 36.36                | 50.18     |
| 3.14                            | 67.48        | 84.95     | 57.57                  | 72.76     | 60.00                  | 78.49     | 61.68                | 78.73     |

## -FRAP

**FeSO<sub>4</sub> calibration curve:  $Y=27.827x+0,0212$**

|                           |                      |        |        |        |                    |
|---------------------------|----------------------|--------|--------|--------|--------------------|
|                           |                      | DO     | DO     | DO     | mg en µL ensayados |
| Sample                    | Blanco work solution | 0.1027 | 0.1005 | 0.1006 |                    |
| Cotyledons-15µl extracts  | sample               | 0.71   | 0.7595 | 0.7686 | 0.4755             |
|                           | control              | 0.0477 | 0.042  | 0.0402 |                    |
| Seeds 15 µl extracts 1/10 | Sample               | 0.5458 | 0.5749 | 0.6138 | 0.06495            |
|                           | control              | 0.0362 | 0.0375 | 0.035  |                    |

## - Hydrogen peroxide scavenging activity

|        |       |       |            |              |
|--------|-------|-------|------------|--------------|
| Sample | µg/ml | DO    | %          | % depuration |
| Seeds  | 21.21 | 0.288 | 61.2765957 | 38.7234043   |
|        |       | 0.283 | 60.212766  | 39.787234    |
|        |       | 0.278 | 59.1489362 | 40.8510638   |
|        | 31.82 | 0.217 | 46.1702128 | 53.8297872   |
|        |       | 0.217 | 46.1702128 | 53.8297872   |
|        |       | 0.213 | 45.3191489 | 54.6808511   |
|        | 42.43 | 0.187 | 39.787234  | 60.212766    |
|        |       | 0.183 | 38.9361702 | 61.0638298   |
|        |       | 0.182 | 38.7234043 | 61.2765957   |
| c 100% |       | 0.446 |            |              |
|        |       | 0.498 |            |              |
|        |       | 0.468 |            |              |
| Blanco |       | 0.046 |            |              |
|        |       | 0.045 |            |              |
|        |       | 0.044 |            |              |

| muestra    | µg/ml  | DO    | %          | % depuration |
|------------|--------|-------|------------|--------------|
| Cotyledons | 59.07  | 0.373 | 79.3617021 | 20.6382979   |
|            |        | 0.41  | 87.2340426 | 12.7659574   |
|            |        | 0.41  | 87.2340426 | 12.7659574   |
|            | 88.60  | 0.361 | 76.8085106 | 23.1914894   |
|            |        | 0.381 | 81.0638298 | 18.9361702   |
|            |        | 0.404 | 85.9574468 | 14.0425532   |
|            | 118.14 | 0.398 | 84.6808511 | 15.3191489   |
|            |        | 0.387 | 82.3404255 | 17.6595745   |
|            |        | 0.376 | 80         | 20           |
| c 100%     |        | 0.479 |            |              |
|            |        | 0.497 |            |              |
|            |        | 0.471 |            |              |
| Blanco     |        | 0.046 |            |              |
|            |        | 0.045 |            |              |
|            |        | 0.044 |            |              |

### - Superoxide anion scavenging

| Sample     | µg/ml | Control 100% | Sample control | DO    |       |       |
|------------|-------|--------------|----------------|-------|-------|-------|
| Seeds      | 6.73  | 0.894        | 0.132          | 0.76  | 0.773 | 0.76  |
|            | 16.83 | 0.898        | 0.159          | 0.68  | 0.776 | 0.787 |
|            | 33.67 | 0.82         | 0.226          | 0.775 | 0.784 | 0.801 |
|            | 50.50 | 0.696        | 0.229          | 0.841 | 0.906 | 0.94  |
| Cotyledons | 6.05  | 0.771        | 0.123          | 0.811 | 0.81  | 0.833 |
|            | 12.09 | 0.875        | 0.136          | 0.863 | 0.879 | 0.852 |
|            | 18.14 | 0.697        | 0.145          | 0.976 | 1.014 | 0.97  |
|            | 24.18 | 0.728        | 0.18           | 0.999 | 1.08  | 1.076 |
|            | 30.23 | 0.618        | 0.161          | 1.098 | 1.099 | 1.082 |

### - β-Carotene-linoleic acid bleaching assay

| Samples    | µg/ml | Average DO t0 | Average DO t 2 hs | Sample control | Average R |
|------------|-------|---------------|-------------------|----------------|-----------|
| Seeds      | 7.26  | 0.966         | 0.382             | 0.03           | 0.598     |
|            | 14.52 | 0.966         | 0.437             | 0.046          | 0.529     |
|            | 29.04 | 0.966         | 0.711             | 0.094          | 0.255     |
| Cotyledons | 9.31  | 0.966         | 0.373             | 0.007          | 0.593     |
|            | 18.62 | 0.966         | 0.486             | 0.015          | 0.48      |
|            | 37.24 | 0.966         | 0.573             | 0.091          | 0.438     |
| Control    |       | 0.966         | 0.274             |                | 0.692     |

### - Inhibitory activity of enzymes related to metabolic syndrome

#### - α-Glucosidase inhibition

| Sample | µg/ml | DO sample |       |       | DO sample control |       |       | DO control 100% |       |       | I %   |       |       |
|--------|-------|-----------|-------|-------|-------------------|-------|-------|-----------------|-------|-------|-------|-------|-------|
| Seeds  | 1.88  | 1.135     | 1.011 | 0.918 | 0.108             | 0.107 | 0.109 | 1.452           | 1.431 | 1.441 | 29.27 | 36.83 | 43.88 |
|        | 3.76  | 1.105     | 0.851 | 0.845 | 0.157             | 0.159 | 0.160 | 1.452           | 1.431 | 1.441 | 34.71 | 51.64 | 52.48 |
|        | 7.52  | 0.992     | 0.81  | 0.743 | 0.246             | 0.236 | 0.182 | 1.452           | 1.431 | 1.441 | 48.62 | 59.89 | 61.08 |
|        | 11.3  | 0.902     | 0.871 | 0.835 | 0.347             | 0.346 | 0.324 | 1.452           | 1.431 | 1.441 | 61.78 | 63.31 | 64.55 |

|            |      |       |       |        |       |       |       |       |       |       |       |       |       |
|------------|------|-------|-------|--------|-------|-------|-------|-------|-------|-------|-------|-------|-------|
| Cotyledons | 1.36 | 1.354 | 1.299 | 1.3265 | 0.218 | 0.239 | 0.224 | 1.555 | 1.781 | 1.668 | 26.94 | 40.48 | 33.90 |
|            | 2.72 | 1.266 | 1.405 | 1.375  | 0.383 | 0.385 | 0.397 | 1.555 | 1.781 | 1.668 | 43.21 | 42.73 | 41.37 |
|            | 4.04 | 1.56  | 1.429 | 1.39   | 0.554 | 0.54  | 0.534 | 1.555 | 1.781 | 1.668 | 35.30 | 50.08 | 48.68 |
|            | 5.4  | 1.918 | 1.947 | 1.915  | 0.7   | 0.681 | 0.697 | 1.555 | 1.781 | 1.668 | 21.67 | 28.92 | 26.98 |

### - $\alpha$ -Amylase inhibition

|                | $\mu\text{g/mL}$ | DO    |       |       | AMILASE (UA/DL) | % Residual activity | % Inhibición |
|----------------|------------------|-------|-------|-------|-----------------|---------------------|--------------|
| 100% Activity  |                  | 0.190 | 0.188 | 0.192 | 2472.90         |                     |              |
| Seeds          | 3.25             | 0.165 | 0.24  | 0.277 | 1973.05         | 79.79               | 20.21        |
| Sample control |                  | 0.004 | 0.006 | 0.004 |                 |                     |              |
| Seeds          | 9.74             | 0.278 | 0.267 | 0.272 | 1493.41         | 60.399              | 39.61        |
| Sample control |                  | 0.007 | 0.007 | 0.007 |                 |                     |              |
| Seeds          | 32.48            | 0.288 | 0.289 | 0.290 | 1536.40         | 62.13               | 37.87        |
| Sample control |                  | 0.027 | 0.028 | 0.029 |                 |                     |              |

### -Technofunctional properties

| Water holding capacity and oil holding capacity |                  |            |               |                                |
|-------------------------------------------------|------------------|------------|---------------|--------------------------------|
|                                                 | Sample flour (g) | Solvent(g) | Recovered (g) | Retained (g) /Sample flour (g) |
| Seeds-Water                                     | 0.5011           | 5.0083     | 4.1817        | 0.8266                         |
|                                                 | 0.5043           | 4.9915     | 3.9836        | 1.0079                         |
|                                                 | 0.5027           | 4,9999     | 4,08265       | 0,9172                         |
| Seeds-Oil                                       | 0.5089           | 5.0305     | 4.2253        | 0.8052                         |
|                                                 | 0.5021           | 4.8813     | 4.0512        | 0.8301                         |
|                                                 | 0.5055           | 4,9557     | 4.1382        | 0.8176                         |
| Cotyledons-Water                                | 0.5006           | 4.9835     | 3.7975        | 1.1860                         |
|                                                 | 0.5043           | 4.9841     | 3.8279        | 1.1562                         |
|                                                 | 0.5024           | 4.9838     | 3.8127        | 1.1711                         |
| Cotyledons-Oil                                  | 0.5069           | 5.1073     | 4.4089        | 0.6984                         |
|                                                 | 0.509            | 5.1300     | 4.3857        | 0.7443                         |
|                                                 | 0.5079           | 5.1186     | 4.3973        | 0.7212                         |

|  |  |  |  |                      |  |                       |
|--|--|--|--|----------------------|--|-----------------------|
|  |  |  |  | Emulsifying activity |  | Emulsifying stability |
|--|--|--|--|----------------------|--|-----------------------|

| muestra    | Flour sample (g) | Tube volume | Emulsion volume | ml emulsified / Tube volume | Emulsion volume 80 °C | ml emulsified 80°C/ Tube volume |
|------------|------------------|-------------|-----------------|-----------------------------|-----------------------|---------------------------------|
| Seeds      | 1.0422           | 10          | 1               | 0.1                         | 0.5                   | 0.05                            |
|            | 1.0422           | 10          | 2               | 0.2                         | 0.5                   | 0.05                            |
|            | 1.0422           | 10          | 1               | 0.1                         | 0.5                   | 0.05                            |
| Cotyledons | 1.0091           | 10          | 0.6             | 0.06                        | 0.6                   | 0.06                            |
|            | 1.0091           | 10          | 0.6             | 0.06                        | 0.5                   | 0.05                            |
|            | 1.0091           | 10          | 0.7             | 0.07                        | 0.5                   | 0.05                            |
